# Supplementary material for: The ‘de novo’ DNA methyltransferase Dnmt3b compensates the Dnmt1-deficient intestinal epithelium
Source: eLife. 2016 Jan 25;5:e12975. doi: 10.7554/eLife.12975 (PMC4786433; doi:10.7554/eLife.12975)
Supplement: Figure 1—source data 1. — DOI: http://dx.doi.org/10.7554/eLife.12975.004 [file elife-12975-fig1-data1.xlsx]

## Sheet: 1A Percent of initial weight
mouse	sex	geno	dob	date tam	weight day 1	% Day 2	Day 3	Day 4	Day 5	Day 6	Day 7	Day 8	Day 9	Day 10	Day 11	Day 12	Day 13	Day 14	Day 15	Day 16	Day 17
8019	f	1L/1L	2015-03-18	5/26-5/28	23.9	96.2343	96.6527	99.1632	100.418	100.837	97.0711	91.2134	86.1925	79.9163	74.8954	76.569	74.477	76.1506	78.2427	79.0795	86.6109
8457	m	1L/1L	2015-05-27	8/24-8/26	26.3	95.4373	98.0989	99.2395	101.901	103.422	104.563	104.943	104.563	104.183	103.422	98.8593	105.703	107.224	106.084	104.183	103.422
8460	f	1L/1L	2015-05-27	8/24-8/26	19.7	97.9695	99.4924	103.553	107.614	107.614	109.137	113.706	114.213	115.736	112.69	111.675	114.213	113.706	113.198	111.675	110.66
8675	m	1L/1L	2015-06-23	8/24-8/26	26.7	101.498	100	104.494	106.742	109.738	109.363	111.236	111.236	112.734	114.232	113.109	113.109	112.36	109.738	111.985	113.109
8677	m	1L/1L	2015-06-23	8/24-8/26	21.2	94.8113	98.1132	101.415	103.302	107.547	107.075	107.547	106.604	106.604	105.66	109.434	108.962	109.906	106.604	108.019	109.434
Average						97.1901	98.4714	101.573	103.995	105.832	105.442	105.729	104.562	103.835	102.18	101.929	103.293	103.869	102.773	102.988	104.647
SEM						1.20023	0.589649	1.08934	1.38382	1.61452	2.26432	3.92797	4.89538	6.3274	7.11979	6.81486	7.36176	7.01732	6.26323	6.14315	4.78263
					weight day 1	% Day 2	Day 3	Day 4	Day 5	Day 6	Day 7	Day 8	Day 9	Day 10	Day 11	Day 12	Day 13	Day 14	Day 15	Day 16	Day 17
7493	m	1L/1L, cre	2014-12-19	5/3-5/5	33.9	99.115	101.475	102.655	103.245	105.605	105.9	103.245	103.245	102.655	102.655	104.72	106.49	104.425	106.195	107.67	105.9
7558	m	1L/1L, cre	2014-12-28	5/3-5/5	31.1	98.3923	98.3923	96.7846	98.0707	97.7492	100.965	91.3183	84.8875	80.7074	80.0643	81.672	82.6367	82.3151	81.0289	87.1383	90.0322
7796	f	1L/1L, cre	2015-02-25	5/26-5/28	22.5	92.4444	96	96.8889	100.889	100.889	99.5556	96.4444	89.3333	83.5556	73.7778	71.1111	68.8889	68.4444	69.3333	73.3333	82.6667
7797	f	1L/1L, cre	2015-02-25	5/26-5/28	22.1	98.6425	102.262	102.715	104.072	105.882	106.335	107.692	105.43	102.262	99.5475	99.5475	104.072	105.43	102.715	104.072	109.955
8015	f	1L/1L, cre	2015-03-18	5/26-5/28	21.8	97.7064	96.3303	98.1651	101.376	101.376	104.128	101.835	96.3303	90.8257	85.7798	80.7339	82.5688	82.5688	83.0275	87.156	94.9541
8016	f	1L/1L, cre	2015-03-18	5/26-5/28	20.7	94.2029	94.686	99.0338	99.0338	100.483	98.0676	93.2367	86.9565	81.6425	76.3285	72.4638	70.0483	69.5652	70.5314	75.8454	82.6087
8017	f	1L/1L, cre	2015-03-18	5/26-5/28	19.6	92.8571	93.8776	98.9796	101.531	103.061	101.531	101.531	93.3673	88.2653	79.5918	79.0816	81.1224	80.6122	84.6939	90.8163	96.4286
8456	m	1L/1L, cre	2015-05-27	8/24-8/26	27.4	93.0657	98.1752	101.46	101.46	100.73	101.825	100	97.0803	88.6861	83.2117	77.7372	74.4526	77.3723	75.1825	79.927	82.4818
8674	m	1L/1L, cre	2015-06-23	8/24-8/26	21	97.619	100.952	105.238	105.238	105.714	106.667	102.381	93.3333	87.619	80.4762	82.381	80	80.9524	83.3333	87.619	95.2381
Average						96.0051	98.0168	100.213	101.657	102.388	102.775	99.7426	94.4404	89.5799	84.6036	83.272	83.3644	83.5206	84.0045	88.1753	93.3627
SEM						0.930216	1.01316	0.978505	0.760534	0.951919	1.0386	1.72497	2.31106	2.68158	3.33526	3.81443	4.48359	4.40054	4.2944	3.87744	3.34885
Ttest vs 1LL						0.455593	0.758905	0.397563	0.130311	0.0718301	0.240845	0.1299	0.053716	0.0312647	0.0248889	0.0229542	0.0300384	0.0236164	0.0261208	0.0529926	0.072295

## Sheet: 1B Initial Weight and Survival 
mouse	sex	geno	dob	date tam	weight (g) day 1	weight (g) day 2	weight (g) day 3	weight (g) day 4	weight (g) day 5	weight (g) day 6	weight (g) day 7	weight (g) day 8	weight (g) day 9	weight (g) day 10	weight (g) day 11	weight (g) day 12	weight (g) day 13	weight (g) day 14	weight (g) day 15	weight (g) day 16	weight (g) day 17	Alive at end?
7493	m	1L/1L, cre	2014-12-19	5/3-5/5	33.9	33.6	34.4	34.8	35	35.8	35.9	35	35	34.8	34.8	35.5	36.1	35.4	36	36.5	35.9	y
7558	m	1L/1L, cre	2014-12-28	5/3-5/5	31.1	30.6	30.6	30.1	30.5	30.4	31.4	28.4	26.4	25.1	24.9	25.4	25.7	25.6	25.2	27.1	28	y
7796	f	1L/1L, cre	2015-02-25	5/26-5/28	22.5	20.8	21.6	21.8	22.7	22.7	22.4	21.7	20.1	18.8	16.6	16	15.5	15.4	15.6	16.5	18.6	y
7797	f	1L/1L, cre	2015-02-25	5/26-5/28	22.1	21.8	22.6	22.7	23	23.4	23.5	23.8	23.3	22.6	22	22	23	23.3	22.7	23	24.3	y
8015	f	1L/1L, cre	2015-03-18	5/26-5/28	21.8	21.3	21	21.4	22.1	22.1	22.7	22.2	21	19.8	18.7	17.6	18	18	18.1	19	20.7	y
8016	f	1L/1L, cre	2015-03-18	5/26-5/28	20.7	19.5	19.6	20.5	20.5	20.8	20.3	19.3	18	16.9	15.8	15	14.5	14.4	14.6	15.7	17.1	y
8017	f	1L/1L, cre	2015-03-18	5/26-5/28	19.6	18.2	18.4	19.4	19.9	20.2	19.9	19.9	18.3	17.3	15.6	15.5	15.9	15.8	16.6	17.8	18.9	y
8456	m	1L/1L, cre	2015-05-27	8/24-8/26	27.4	25.5	26.9	27.8	27.8	27.6	27.9	27.4	26.6	24.3	22.8	21.3	20.4	21.2	20.6	21.9	22.6	y
8674	m	1L/1L, cre	2015-06-23	8/24-8/26	21	20.5	21.2	22.1	22.1	22.2	22.4	21.5	19.6	18.4	16.9	17.3	16.8	17	17.5	18.4	20	y
8460	f	1L/1L	2015-05-27	8/24-8/26	19.7	19.3	19.6	20.4	21.2	21.2	21.5	22.4	22.5	22.8	22.2	22	22.5	22.4	22.3	22	21.8	y
8675	m	1L/1L	2015-06-23	8/24-8/26	26.7	27.1	26.7	27.9	28.5	29.3	29.2	29.7	29.7	30.1	30.5	30.2	30.2	30	29.3	29.9	30.2	y
8677	m	1L/1L	2015-06-23	8/24-8/26	21.2	20.1	20.8	21.5	21.9	22.8	22.7	22.8	22.6	22.6	22.4	23.2	23.1	23.3	22.6	22.9	23.2	y
8019	f	1L/1L	2015-03-18	5/26-5/28	23.9	23	23.1	23.7	24	24.1	23.2	21.8	20.6	19.1	17.9	18.3	17.8	18.2	18.7	18.9	20.7	y
8457	m	1L/1L	2015-05-27	8/24-8/26	26.3	25.1	25.8	26.1	26.8	27.2	27.5	27.6	27.5	27.4	27.2	2.6	27.8	28.2	27.9	27.4	27.2	y

## Sheet: 1K Line1 methylation
LINE1	Position	Dnmt1LL Replicate 1	Dnmt1LL Replicate 2	Dnmt1LL Replicate 3	Dnmt1LL Replicate 4	Dnmt1LL Replicate 1	Dnmt1LL Replicate 2	Dnmt1LL Replicate 3	Dnmt1LL Replicate 4	AVERAGE	STDEV	SEM	Ttest
D84391	976	0.823	0.864	0.823	0.832	82.3	86.4	82.3	83.2	83.55	1.94679	0.973396	4.88799e-05
D84391	986	0.818	0.847	0.815	0.826	81.8	84.7	81.5	82.6	82.65	1.44338	0.721688	3.90902e-05
D84391	997	0.9	0.92	0.904	0.904	90	92	90.4	90.4	90.7	0.886942	0.443471	2.23177e-05
D84391	1002	0.894	0.916	0.899	0.903	89.4	91.6	89.9	90.3	90.3	0.94163	0.470815	1.69084e-05
D84391	1021	0.886	0.909	0.895	0.887	88.6	90.9	89.5	88.7	89.425	1.06262	0.531311	2.86833e-05
D84391	1033	0.856	0.875	0.857	0.856	85.6	87.5	85.7	85.6	86.1	0.934523	0.467262	3.33188e-05
D84391	1054	0.838	0.859	0.831	0.833	83.8	85.9	83.1	83.3	84.025	1.2842	0.642099	3.74474e-05
D84391	1058	0.816	0.847	0.812	0.815	81.6	84.7	81.2	81.5	82.25	1.64215	0.821077	6.57927e-05
D84391	1072	0.817	0.846	0.812	0.826	81.7	84.6	81.2	82.6	82.525	1.49972	0.749861	6.82428e-05
										85.725	3.5161	1.17203	1.29377e-13
LINE1		Dnmt1LL Cre Replicate 1	Dnmt1LL Cre Replicate 2	Dnmt1LL Cre Replicate 3	Dnmt1LL Cre Replicate 4	Dnmt1LL Cre Replicate 1	Dnmt1LL Cre Replicate 2	Dnmt1LL Cre Replicate 3	Dnmt1LL Cre Replicate 4	AVERAGE	STDEV	SEM
D84391	976	0.374	0.514	0.322	0.362	37.4	51.4	32.2	36.2	39.3	8.3674	4.1837
D84391	986	0.397	0.523	0.353	0.376	39.7	52.3	35.3	37.6	41.225	7.59885	3.79942
D84391	997	0.488	0.605	0.453	0.481	48.8	60.5	45.3	48.1	50.675	6.72229	3.36114
D84391	1002	0.46	0.574	0.415	0.456	46	57.4	41.5	45.6	47.625	6.8266	3.4133
D84391	1021	0.402	0.547	0.367	0.386	40.2	54.7	36.7	38.6	42.55	8.22537	4.11268
D84391	1033	0.429	0.551	0.382	0.403	42.9	55.1	38.2	40.3	44.125	7.565	3.7825
D84391	1054	0.44	0.561	0.408	0.425	44	56.1	40.8	42.5	45.85	6.95725	3.47863
D84391	1058	0.355	0.504	0.296	0.341	35.5	50.4	29.6	34.1	37.4	9.02478	4.51239
D84391	1072	0.367	0.518	0.315	0.361	36.7	51.8	31.5	36.1	39.025	8.82775	4.41387
										43.0861	4.38494	1.46165

## Sheet: 1L H19 methylation
H19	Position	Dnmt1LL Replicate 1	Dnmt1LL Replicate 2	Dnmt1LL Replicate 3	Dnmt1LL Replicate 4	Dnmt1LL Replicate 1	Dnmt1LL Replicate 2	Dnmt1LL Replicate 3	Dnmt1LL Replicate 4	AVERAGE	STDEV	SEM	Ttest
chr7	149766621	0.503	0.467	0.414	0.403	50.3	46.7	41.4	40.3	44.675	4.67645	2.33822	0.0505496
chr7	149766652	0.519	0.509	0.415	0.419	51.9	50.9	41.5	41.9	46.55	5.61753	2.80877	0.122733
chr7	149766676	0.522	0.537	0.415	0.412	52.2	53.7	41.5	41.2	47.15	6.72632	3.36316	0.137159
chr7	149766678	0.524	0.54	0.415	0.415	52.4	54	41.5	41.5	47.35	6.78651	3.39325	0.138421
chr7	149766680	0.497	0.501	0.409	0.431	49.7	50.1	40.9	43.1	45.95	4.65152	2.32576	0.161994
chr7	149766690	0.519	0.535	0.409	0.375	51.9	53.5	40.9	37.5	45.95	7.94376	3.97188	0.195243
										46.2708	0.976527	0.398665	2.37493e-06
H19	Position	Dnmt1LL Cre Replicate 1	Dnmt1LL Cre Replicate 2	Dnmt1LL Cre Replicate 3	Dnmt1LL Cre Replicate 4	Dnmt1LL Cre Replicate 1	Dnmt1LL Cre Replicate 2	Dnmt1LL Cre Replicate 3	Dnmt1LL Cre Replicate 4	AVERAGE	STDEV	SEM
chr7	149766621	0.42	0.382	0.256	0.293	42	38.2	25.6	29.3	33.775	7.61769	3.80884
chr7	149766652	0.474	0.415	0.287	0.312	47.4	41.5	28.7	31.2	37.2	8.77078	4.38539
chr7	149766676	0.47	0.414	0.34	0.353	47	41.4	34	35.3	39.425	5.99243	2.99621
chr7	149766678	0.484	0.412	0.314	0.327	48.4	41.2	31.4	32.7	38.425	7.94413	3.97206
chr7	149766680	0.486	0.411	0.324	0.334	48.6	41.1	32.4	33.4	38.875	7.55927	3.77963
chr7	149766690	0.479	0.412	0.288	0.311	47.9	41.2	28.8	31.1	37.25	8.9116	4.4558
										37.4917	2.02384	0.826228
