# Supplementary material for: The ‘de novo’ DNA methyltransferase Dnmt3b compensates the Dnmt1-deficient intestinal epithelium
Source: eLife. 2016 Jan 25;5:e12975. doi: 10.7554/eLife.12975 (PMC4786433; doi:10.7554/eLife.12975)
Supplement: Figure 2—source data 1. — DOI: http://dx.doi.org/10.7554/eLife.12975.006 [file elife-12975-fig2-data1.xlsx]

## Sheet: Fig2I LINE data
genotype	Position in LINE1 element	meC	Dnmt1 LL	Position	Replicate 1	Replicate 2	Replicate 3	Replicate 4	Replicate 5	Replicate 6	Average	STDEV	SEM
Dnmt1LL VillinCreERT2	976	0.798		976	84.8	86	83.4	80.6	85.2	87	84.5	2.25832	0.921954
Dnmt1LL VillinCreERT2	986	0.786		986	85.4	86	84	80.5	86.7	84.9	84.5833	2.2031	0.899413
Dnmt1LL VillinCreERT2	997	0.865		997	92.1	91.8	92.1	84.9	92.4	91.9	90.8667	2.9303	1.19629
Dnmt1LL VillinCreERT2	1002	0.84		1002	90.2	89.9	90.2	86.6	91	92.4	90.05	1.91807	0.78305
Dnmt1LL VillinCreERT2	1021	0.839		1021	89	90.5	90	85.2	90	90.6	89.2167	2.04784	0.836029
Dnmt1LL VillinCreERT2	1033	0.782		1033	85.3	84.3	86.1	82.4	84.7	88.3	85.1833	1.96613	0.802669
Dnmt1LL VillinCreERT2	1054	0.821		1054	88.1	87.9	86.2	84.3	87.5	87.2	86.8667	1.42361	0.581187
Dnmt1LL VillinCreERT2	1058	0.86		1058	86.9	88.1	84.8	84	85.1	90	86.4833	2.28335	0.932172
Dnmt1LL VillinCreERT2	1072	0.828		1072	88.7	89.3	90	87.3	87.6	89.2	88.6833	1.04579	0.42694
Dnmt1 LL	976	0.848									87.3815	2.40745	0.802482
Dnmt1 LL	986	0.854
Dnmt1 LL	997	0.921
Dnmt1 LL	1002	0.902
Dnmt1 LL	1021	0.89
Dnmt1 LL	1033	0.853	Dnmt1LL VillinCreERT2	Position	Replicate 1	Replicate 2	Replicate 3	Replicate 4	Replicate 5	Average	STDEV	SEM	Ttest
Dnmt1 LL	1054	0.881		976	79.8	83.4	79.7	80.3	80.7	80.78	1.51888	0.679264	0.00614832	**
Dnmt1 LL	1058	0.869		986	78.6	83.1	79.9	83.2	83	81.56	2.1594	0.965712	0.029992	*
Dnmt1 LL	1072	0.887		997	86.5	89.8	86.7	85.9	90.7	87.92	2.17071	0.970773	0.0671307
Dnmt1LL VillinCreERT2	976	0.834		1002	84	90.5	89.1	86.9	86.6	87.42	2.4974	1.11687	0.0535123
Dnmt1LL VillinCreERT2	986	0.831		1021	83.9	88.4	82.8	85.5	85	85.12	2.10879	0.94308	0.00481349	**
Dnmt1LL VillinCreERT2	997	0.898		1033	78.2	87.9	79.6	79.9	81.6	81.44	3.80828	1.70311	0.0419503	*
Dnmt1LL VillinCreERT2	1002	0.905		1054	82.1	88	85.9	84.2	82	84.44	2.56379	1.14656	0.0522407
Dnmt1LL VillinCreERT2	1021	0.884		1058	86	87.6	80.5	87.6	83.6	85.06	3.02952	1.35484	0.348366
Dnmt1LL VillinCreERT2	1033	0.879		1072	82.8	87.3	81.7	85.8	88	85.12	2.76532	1.23669	0.00871575	**
Dnmt1LL VillinCreERT2	1054	0.88		Average						84.3178	2.5704	0.856799	0.018959	*
Dnmt1LL VillinCreERT2	1058	0.876
Dnmt1LL VillinCreERT2	1072	0.873
Dnmt1 LL	976	0.86
Dnmt1 LL	986	0.86
Dnmt1 LL	997	0.918
Dnmt1 LL	1002	0.899
Dnmt1 LL	1021	0.905
Dnmt1 LL	1033	0.843
Dnmt1 LL	1054	0.879
Dnmt1 LL	1058	0.881
Dnmt1 LL	1072	0.893
Dnmt1LL VillinCreERT2	976	0.797
Dnmt1LL VillinCreERT2	986	0.799
Dnmt1LL VillinCreERT2	997	0.867
Dnmt1LL VillinCreERT2	1002	0.891
Dnmt1LL VillinCreERT2	1021	0.828
Dnmt1LL VillinCreERT2	1033	0.796
Dnmt1LL VillinCreERT2	1054	0.859
Dnmt1LL VillinCreERT2	1058	0.805
Dnmt1LL VillinCreERT2	1072	0.817
Dnmt1 LL	976	0.834
Dnmt1 LL	986	0.84
Dnmt1 LL	997	0.921
Dnmt1 LL	1002	0.902
Dnmt1 LL	1021	0.9
Dnmt1 LL	1033	0.861
Dnmt1 LL	1054	0.862
Dnmt1 LL	1058	0.848
Dnmt1 LL	1072	0.9
Dnmt1 LL	976	0.806
Dnmt1 LL	986	0.805
Dnmt1 LL	997	0.849
Dnmt1 LL	1002	0.866
Dnmt1 LL	1021	0.852
Dnmt1 LL	1033	0.824
Dnmt1 LL	1054	0.843
Dnmt1 LL	1058	0.84
Dnmt1 LL	1072	0.873
Dnmt1 LL	976	0.852
Dnmt1 LL	986	0.867
Dnmt1 LL	997	0.924
Dnmt1 LL	1002	0.91
Dnmt1 LL	1021	0.9
Dnmt1 LL	1033	0.847
Dnmt1 LL	1054	0.875
Dnmt1 LL	1058	0.851
Dnmt1 LL	1072	0.876
Dnmt1 LL	976	0.87
Dnmt1 LL	986	0.849
Dnmt1 LL	997	0.919
Dnmt1 LL	1002	0.924
Dnmt1 LL	1021	0.906
Dnmt1 LL	1033	0.883
Dnmt1 LL	1054	0.872
Dnmt1 LL	1058	0.9
Dnmt1 LL	1072	0.892
Dnmt1LL VillinCreERT2	976	0.803
Dnmt1LL VillinCreERT2	986	0.832
Dnmt1LL VillinCreERT2	997	0.859
Dnmt1LL VillinCreERT2	1002	0.869
Dnmt1LL VillinCreERT2	1021	0.855
Dnmt1LL VillinCreERT2	1033	0.799
Dnmt1LL VillinCreERT2	1054	0.842
Dnmt1LL VillinCreERT2	1058	0.876
Dnmt1LL VillinCreERT2	1072	0.858
Dnmt1LL VillinCreERT2	976	0.807
Dnmt1LL VillinCreERT2	986	0.83
Dnmt1LL VillinCreERT2	997	0.907
Dnmt1LL VillinCreERT2	1002	0.866
Dnmt1LL VillinCreERT2	1021	0.85
Dnmt1LL VillinCreERT2	1033	0.816
Dnmt1LL VillinCreERT2	1054	0.82
Dnmt1LL VillinCreERT2	1058	0.836
Dnmt1LL VillinCreERT2	1072	0.88

## Sheet: Fig2J H19 data
Dnmt1LL	Position	Replicate 1	Replicate 2	Replicate 3	Replicate 4	Replicate 5	Avg	SEM
Chr7	149766621	48.2	45.9	46	44.5	44.2	45.76	0.708943
Chr7	149766652	53.6	53.3	54.5	54.9	52.3	53.72	0.458694
Chr7	149766676	50.3	49.2	49.9	49.5	47.3	49.24	0.51923
Chr7	149766678	50.6	49.4	50	49.4	47.3	49.34	0.556417
Chr7	149766680	50.3	49.5	49.5	49	47.3	49.12	0.5004
Chr7	149766690	49.6	49	48.9	48.7	46.7	48.58	0.493356
	AVG						49.2933	1.04281
Dnmt1LL VillinCreERT2	Position	Replicate 1	Replicate 2	Replicate 3	AVG	SEM	Ttest
Chr7	149766621	45.4	47	44.2	45.5333	0.811035	0.845696
Chr7	149766652	55.8	55.9	52.9	54.8667	0.983757	0.269887
Chr7	149766676	50.3	52.4	47.8	50.1667	1.32958	0.466642
Chr7	149766678	50.5	52.3	48	50.2667	1.24677	0.460148
Chr7	149766680	50.3	51.9	47.7	49.9667	1.22384	0.476538
Chr7	149766690	49.8	51.3	47	49.3667	1.26007	0.512794
	AVG				50.0278	1.21288	0.655938
