# Supplementary material for: The ‘de novo’ DNA methyltransferase Dnmt3b compensates the Dnmt1-deficient intestinal epithelium
Source: eLife. 2016 Jan 25;5:e12975. doi: 10.7554/eLife.12975 (PMC4786433; doi:10.7554/eLife.12975)
Supplement: Figure 3—source data 1. — DOI: http://dx.doi.org/10.7554/eLife.12975.008 [file elife-12975-fig3-data1.xlsx]

## Sheet: LL qPCR data
Well	Well Type	Mouse Number	Threshold (dRn)	Ct (dRn)	Median	GEOM MEAN	Delta GM	Fold Change
A1	TBP	8165	0.2801	32.27	32.27	27.8727
A2	TBP	8165	0.2801	30.99
A3	TBP	8165	0.2801	32.32
B1	Beta Actin	8165	0.2801	24.59	24.49
B2	Beta Actin	8165	0.2801	24.09
B3	Beta Actin	8165	0.2801	24.49
C1	Dnmt1	8165	0.2801	32.35	32.1		4.22728	0.0533902
C2	Dnmt1	8165	0.2801	32.1
C3	Dnmt1	8165	0.2801	31.39
D1	Dnmt3a	8165	0.2801	32.01	30.87		2.99728	0.125236
D2	Dnmt3a	8165	0.2801	30.58
D3	Dnmt3a	8165	0.2801	30.87
E1	Dnmt3b	8165	0.2801	36.01	35.7		7.82728	0.00440305
E2	Dnmt3b	8165	0.2801	35.7
E3	Dnmt3b	8165	0.2801	34.38
A4	TBP	8172	0.1498	30.81	31.13	27.014
A5	TBP	8172	0.1498	31.13
A6	TBP	8172	0.1498	31.55
B4	Beta Actin	8172	0.1498	23.01	23.15
B5	Beta Actin	8172	0.1498	23.15
B6	Beta Actin	8172	0.1498	24.11
C4	Dnmt1	8172	0.1498	32.16	32.88		5.86598	0.017146
C5	Dnmt1	8172	0.1498	32.88
C6	Dnmt1	8172	0.1498	33.07
D4	Dnmt3a	8172	0.1498	29.76	30.12		3.10598	0.116146
D5	Dnmt3a	8172	0.1498	30.12
D6	Dnmt3a	8172	0.1498	30.99
E4	Dnmt3b	8172	0.1498	34.99	34.94		7.92598	0.00411189
E5	Dnmt3b	8172	0.1498	34.89
E6	Dnmt3b	8172	0.1498	No Ct
A1	TBP	8175	0.3281	31.55	32	27.8559
A2	TBP	8175	0.3281	32
A3	TBP	8175	0.3281	32
B1	Beta Actin	8175	0.3281	24.47	24.37
B2	Beta Actin	8175	0.3281	24.37
B3	Beta Actin	8175	0.3281	24.25
C1	Dnmt1	8175	0.3281	34.87	34.87		7.01413	0.00773637
C2	Dnmt1	8175	0.3281	34.26
C3	Dnmt1	8175	0.3281	35.55
D1	Dnmt3a	8175	0.3281	23.8	23.75		-4.10587	17.2183
D2	Dnmt3a	8175	0.3281	23.75
D3	Dnmt3a	8175	0.3281	23.72
E1	Dnmt3b	8175	0.3281	33.05	33.06		5.20413	0.027127
E2	Dnmt3b	8175	0.3281	33.73
E3	Dnmt3b	8175	0.3281	33.06
A1	TBP	7931	0.1678	29.32	29.32	24.4623
A2	TBP	7931	0.1678	28.92
A3	TBP	7931	0.1678	29.84
A4	Beta Actin	7931	0.1678	20.36	20.36
A5	Beta Actin	7931	0.1678	20.34
A6	Beta Actin	7931	0.1678	20.45
A7	Dnmt1	7931	0.1678	30.02	29.65		5.18771	0.0274375
A8	Dnmt1	7931	0.1678	29.65
A9	Dnmt1	7931	0.1678	29.43
A10	Dnmt3b	7931	0.1678	33.11	32.69		8.22771	0.00333591
A11	Dnmt3b	7931	0.1678	32.3
A12	Dnmt3b	7931	0.1678	32.69
E1	Dnmt3a	7931	0.1678	28.84	28.84		4.37771	0.0481038
E2	Dnmt3a	7931	0.1678	28.74
E3	Dnmt3a	7931	0.1678	29
B1	TBP	7936	0.1678	28.82	28.69	23.868
B2	TBP	7936	0.1678	28.69
B3	TBP	7936	0.1678	28.62
B4	Beta Actin	7936	0.1678	19.9	19.9
B5	Beta Actin	7936	0.1678	19.99
B6	Beta Actin	7936	0.1678	19.64
B7	Dnmt1	7936	0.1678	28.66	28.82		4.95195	0.0323083
B8	Dnmt1	7936	0.1678	28.82
B9	Dnmt1	7936	0.1678	29.08
B10	Dnmt3b	7936	0.1678	30.34	30.34		6.47195	0.0112655
B11	Dnmt3b	7936	0.1678	30.76
B12	Dnmt3b	7936	0.1678	29.99
F1	Dnmt3a	7936	0.1678	28.42	28.42		4.55195	0.0426311
F2	Dnmt3a	7936	0.1678	28.73
F3	Dnmt3a	7936	0.1678	28.05

## Sheet: LLCre qPCR data
Well	Well Type	Mouse Number	Threshold (dRn)	Ct (dRn)	Median	GEOM MEAN	Delta GM	Fold Change
A1	TBP	8171	0.1498	31.43	31.43	27.5799
A2	TBP	8171	0.1498	31.27
A3	TBP	8171	0.1498	32.94
B1	Beta Actin	8171	0.1498	23.75	23.8
B2	Beta Actin	8171	0.1498	23.8
B3	Beta Actin	8171	0.1498	24.05
C1	Dnmt1	8171	0.1498	35.15	34.97		7.39015	0.00596133
C2	Dnmt1	8171	0.1498	33.6
C3	Dnmt1	8171	0.1498	34.97
D1	Dnmt3a	8171	0.1498	31.31	31.31		3.73015	0.0753552
D2	Dnmt3a	8171	0.1498	31.6
D3	Dnmt3a	8171	0.1498	31.16
E1	Dnmt3b	8171	0.1498	33.06	33.06		5.48015	0.0224032
E2	Dnmt3b	8171	0.1498	32.76
E3	Dnmt3b	8171	0.1498	35.47
A1	TBP	7925	0.2567	28.58	28.65	24.5244
A2	TBP	7925	0.2567	28.76
A3	TBP	7925	0.2567	28.65
A4	Beta Actin	7925	0.2567	20.9	20.94
A5	Beta Actin	7925	0.2567	21.11
A6	Beta Actin	7925	0.2567	20.94
A7	Dnmt1	7925	0.2567	32.35	32.32		7.79563	0.00450071
A8	Dnmt1	7925	0.2567	32.32
A9	Dnmt1	7925	0.2567	31.14
A10	Dnmt3b	7925	0.2567	30.2	30.2		5.67563	0.0195643
A11	Dnmt3b	7925	0.2567	29.79
A12	Dnmt3b	7925	0.2567	30.31
E1	Dnmt3a	7925	0.2567	28.8	28.8		4.27563	0.0516305
E2	Dnmt3a	7925	0.2567	28.7
E3	Dnmt3a	7925	0.2567	28.97
B1	TBP	7926	0.2567	26.31	26.45	22.6602
B2	TBP	7926	0.2567	26.66
B3	TBP	7926	0.2567	26.45
B4	Beta Actin	7926	0.2567	19.43	19.39
B5	Beta Actin	7926	0.2567	19.39
B6	Beta Actin	7926	0.2567	19.37
B7	Dnmt1	7926	0.2567	30.25	30.03		7.36976	0.00604618
B8	Dnmt1	7926	0.2567	30.03
B9	Dnmt1	7926	0.2567	29.58
B10	Dnmt3b	7926	0.2567	27.64	27.26		4.59976	0.0412414
B11	Dnmt3b	7926	0.2567	27.26
B12	Dnmt3b	7926	0.2567	27.08
F1	Dnmt3a	7926	0.2567	26.94	27.23		4.56976	0.042108
F2	Dnmt3a	7926	0.2567	27.23
F3	Dnmt3a	7926	0.2567	27.32

## Sheet: Analysis in Figure 3A
Dnmt1LL mouse number	Dnmt3b fold change	Dnmt3a fold change	Dnmt1 fold change
7936	0.0112655	0.0426311	0.0323083
7931	0.00333591	0.0481038	0.0274375
8172	0.00411189	0.116146	0.017146
8165	0.00440305	0.125236	0.0533902
Average	0.00577907	0.0830293	0.0325705
STDEV	0.00368521	0.0437033	0.0152511
SEM	0.00184261	0.0218517	0.00762557
Dnmt1LL CreERT2 mouse number	Dnmt3b fold change	Dnmt3a fold change	Dnmt1 fold change
7926	0.0412414	0.042108	0.00604618
7925	0.0195643	0.0516305	0.00450071
8171	0.0224032	0.0753552	0.00596133
Average	0.0277363	0.0563646	0.00550274
STDEV	0.0117816	0.0171217	0.000868821
SEM	0.00680211	0.00988522	0.000501614
Ttest	0.0154962	0.371074	0.0302127
	Control	Mutant
Dnmt1	0.0325705	0.00550274
Dnmt3a	0.0830293	0.0563646
Dnmt3b	0.00577907	0.0277363
	SEM CT	SEM MT
Dnmt1	0.00762557	0.000501614
Dnmt3a	0.0218517	0.00988522
Dnmt3b	0.00184261	0.00680211
