# Supplementary material for: The ‘de novo’ DNA methyltransferase Dnmt3b compensates the Dnmt1-deficient intestinal epithelium
Source: eLife. 2016 Jan 25;5:e12975. doi: 10.7554/eLife.12975 (PMC4786433; doi:10.7554/eLife.12975)
Supplement: Figure 3—source data 2. — DOI: http://dx.doi.org/10.7554/eLife.12975.009 [file elife-12975-fig3-data2.xlsx]

## Sheet: H19 analysis
Dnmt1LL Dnmt3ALL	Position	LIB16	LIB20	AVG	SEM
	CG1	48.1	44.2	46.15	1.95
	CG2	49.9	45.1	47.5	2.4
	CG3	49.1	47	48.05	1.05
	CG4	49.5	47.4	48.45	1.05
	CG5	48.1	46.4	47.25	0.85
	CG6	49.2	46.4	47.8	1.4
	AVG			47.5333	0.325235
Dnmt1LL Dnmt3ALL VillinCreERT2	Position	LIB17	LIB18	LIB19	AVG	SEM	Ttest
	CG1	43.4	35.1	38.2	38.9	2.42143	0.126202
	CG2	44.8	40.8	37.8	41.1333	2.02759	0.138235
	CG3	46.5	42	35.9	41.4667	3.07155	0.201844
	CG4	46.6	42.1	37.3	42	2.68514	0.167156
	CG5	43.7	40.4	36.6	40.2333	2.05129	0.0820015
	CG6	45.3	39.9	36.6	40.6	2.53574	0.127108
	AVG				40.7222	0.444611	2.20411e-07	***
genotype	Position Chr7	%Me	%Me
Dnmt1LL Dnmt3ALL	149766621	0.481	48.1
Dnmt1LL Dnmt3ALL	149766652	0.499	49.9
Dnmt1LL Dnmt3ALL	149766676	0.491	49.1
Dnmt1LL Dnmt3ALL	149766678	0.495	49.5
Dnmt1LL Dnmt3ALL	149766680	0.481	48.1
Dnmt1LL Dnmt3ALL	149766690	0.492	49.2
Dnmt1LL Dnmt3ALL	149766621	0.442	44.2
Dnmt1LL Dnmt3ALL	149766652	0.451	45.1
Dnmt1LL Dnmt3ALL	149766676	0.47	47
Dnmt1LL Dnmt3ALL	149766678	0.474	47.4
Dnmt1LL Dnmt3ALL	149766680	0.464	46.4
Dnmt1LL Dnmt3ALL	149766690	0.464	46.4
Dnmt1LL Dnmt3ALL VillinCreERT2	149766621	0.434	43.4
Dnmt1LL Dnmt3ALL VillinCreERT2	149766652	0.448	44.8
Dnmt1LL Dnmt3ALL VillinCreERT2	149766676	0.465	46.5
Dnmt1LL Dnmt3ALL VillinCreERT2	149766678	0.466	46.6
Dnmt1LL Dnmt3ALL VillinCreERT2	149766680	0.437	43.7
Dnmt1LL Dnmt3ALL VillinCreERT2	149766690	0.453	45.3
Dnmt1LL Dnmt3ALL VillinCreERT2	149766621	0.351	35.1
Dnmt1LL Dnmt3ALL VillinCreERT2	149766652	0.408	40.8
Dnmt1LL Dnmt3ALL VillinCreERT2	149766676	0.42	42
Dnmt1LL Dnmt3ALL VillinCreERT2	149766678	0.421	42.1
Dnmt1LL Dnmt3ALL VillinCreERT2	149766680	0.404	40.4
Dnmt1LL Dnmt3ALL VillinCreERT2	149766690	0.399	39.9
Dnmt1LL Dnmt3ALL VillinCreERT2	149766621	0.382	38.2
Dnmt1LL Dnmt3ALL VillinCreERT2	149766652	0.378	37.8
Dnmt1LL Dnmt3ALL VillinCreERT2	149766676	0.359	35.9
Dnmt1LL Dnmt3ALL VillinCreERT2	149766678	0.373	37.3
Dnmt1LL Dnmt3ALL VillinCreERT2	149766680	0.366	36.6
Dnmt1LL Dnmt3ALL VillinCreERT2	149766690	0.366	36.6

## Sheet: LINE1 data and anlysis
Begin	genotype	Position in LINE1 element	meC	Dnmt1LL Dnmt3ALL	Position	LIB 16	LIB20	Average	STDEV	SEM	Ttest
976	Dnmt1LL Dnmt3ALL	976	0.777		CG1	77.7	71.1	74.4	4.6669	3.3	0.00482198	**
986	Dnmt1LL Dnmt3ALL	986	0.774		CG2	77.4	72.4	74.9	3.53553	2.5	0.0078261	**
997	Dnmt1LL Dnmt3ALL	997	0.852		CG3	85.2	79.9	82.55	3.74767	2.65	0.00500079	**
1002	Dnmt1LL Dnmt3ALL	1002	0.839		CG4	83.9	79.7	81.8	2.96985	2.1	0.00319746	**
1021	Dnmt1LL Dnmt3ALL	1021	0.818		CG5	81.8	78	79.9	2.68701	1.9	0.00295968	**
1033	Dnmt1LL Dnmt3ALL	1033	0.803		CG6	80.3	75.9	78.1	3.11127	2.2	0.00250287	**
1054	Dnmt1LL Dnmt3ALL	1054	0.795		CG7	79.5	79	79.25	0.353553	0.25	0.0116427	*
1058	Dnmt1LL Dnmt3ALL	1058	0.792		CG8	79.2	81.3	80.25	1.48492	1.05	0.0175571	*
1072	Dnmt1LL Dnmt3ALL	1072	0.815		CG9	81.5	80.9	81.2	0.424264	0.3	0.0161583	*
976	Dnmt1LL Dnmt3ALL	976	0.711		Average			79.15	2.87869	0.959564	2.64733e-14	***
986	Dnmt1LL Dnmt3ALL	986	0.724
997	Dnmt1LL Dnmt3ALL	997	0.799
1002	Dnmt1LL Dnmt3ALL	1002	0.797
1021	Dnmt1LL Dnmt3ALL	1021	0.78	Dnmt1LL Dnmt3ALL VIllinCreERT2	Position	LIB17	LIB18	LIB19	Average	STDEV	SEM
1033	Dnmt1LL Dnmt3ALL	1033	0.759		CG1	26.3	23.5	37.4	29.0667	7.35142	4.24434
1054	Dnmt1LL Dnmt3ALL	1054	0.79		CG2	31.1	24.9	41.8	32.6	8.54927	4.93592
1058	Dnmt1LL Dnmt3ALL	1058	0.813		CG3	38.8	35.5	48.9	41.0667	6.98164	4.03085
1072	Dnmt1LL Dnmt3ALL	1072	0.809		CG4	34.7	32.8	44.9	37.4667	6.50718	3.75692
976	Dnmt1LL Dnmt3ALL VIllinCreERT2	976	0.263		CG5	30	24.4	38.5	30.9667	7.09953	4.09892
986	Dnmt1LL Dnmt3ALL VIllinCreERT2	986	0.311		CG6	27.7	26.2	37.9	30.6	6.36632	3.6756
997	Dnmt1LL Dnmt3ALL VIllinCreERT2	997	0.388		CG7	34.7	32.2	50.2	39.0333	9.75107	5.62978
1002	Dnmt1LL Dnmt3ALL VIllinCreERT2	1002	0.347		CG8	30.5	28.9	50.8	36.7333	12.2083	7.04848
1021	Dnmt1LL Dnmt3ALL VIllinCreERT2	1021	0.3		CG9	34.7	29.9	51.9	38.8333	11.5678	6.67866
1033	Dnmt1LL Dnmt3ALL VIllinCreERT2	1033	0.277		Average				35.1519	4.37665	1.45888
1054	Dnmt1LL Dnmt3ALL VIllinCreERT2	1054	0.347
1058	Dnmt1LL Dnmt3ALL VIllinCreERT2	1058	0.305
1072	Dnmt1LL Dnmt3ALL VIllinCreERT2	1072	0.347
976	Dnmt1LL Dnmt3ALL VIllinCreERT2	976	0.235
986	Dnmt1LL Dnmt3ALL VIllinCreERT2	986	0.249
997	Dnmt1LL Dnmt3ALL VIllinCreERT2	997	0.355
1002	Dnmt1LL Dnmt3ALL VIllinCreERT2	1002	0.328
1021	Dnmt1LL Dnmt3ALL VIllinCreERT2	1021	0.244
1033	Dnmt1LL Dnmt3ALL VIllinCreERT2	1033	0.262
1054	Dnmt1LL Dnmt3ALL VIllinCreERT2	1054	0.322
1058	Dnmt1LL Dnmt3ALL VIllinCreERT2	1058	0.289
1072	Dnmt1LL Dnmt3ALL VIllinCreERT2	1072	0.299
976	Dnmt1LL Dnmt3ALL VIllinCreERT2	976	0.374
986	Dnmt1LL Dnmt3ALL VIllinCreERT2	986	0.418
997	Dnmt1LL Dnmt3ALL VIllinCreERT2	997	0.489
1002	Dnmt1LL Dnmt3ALL VIllinCreERT2	1002	0.449
1021	Dnmt1LL Dnmt3ALL VIllinCreERT2	1021	0.385
1033	Dnmt1LL Dnmt3ALL VIllinCreERT2	1033	0.379
1054	Dnmt1LL Dnmt3ALL VIllinCreERT2	1054	0.502
1058	Dnmt1LL Dnmt3ALL VIllinCreERT2	1058	0.508
1072	Dnmt1LL Dnmt3ALL VIllinCreERT2	1072	0.519
