# Supplementary material for: The ‘de novo’ DNA methyltransferase Dnmt3b compensates the Dnmt1-deficient intestinal epithelium
Source: eLife. 2016 Jan 25;5:e12975. doi: 10.7554/eLife.12975 (PMC4786433; doi:10.7554/eLife.12975)
Supplement: Figure 4—source data 1. — DOI: http://dx.doi.org/10.7554/eLife.12975.013 [file elife-12975-fig4-data1.xlsx]

## Sheet: Fig4A LogRank Test
Mouse Number	Days Post Tamoxifen	Dnmt1LL Dnmt3bLL	Dnmt1LL VillinCreERT2	Dnmt1LL Dnmt3bLL VillinCreERT2
7495	15	0
7581	15	0
7499	15	0
7583	15	0
7587	15	0
8448	15	0
8454	15	0
8645	15	0
7493	15		0
7558	15		0
7796	15		0
7797	15		0
8015	15		0
8016	15		0
8017	15		0
8456	15		0
8674	15		0
8647	15			0
8650	11			1
8651	15			0
7497	15			0
7501	11			1
8449	15			0
8450	10			1
8453	12			1
2957	15		0
2961	15		0
2965	14		1
3402	15		0
3405	15		0
3946	15		0
3948	15		0
6942	12			1
6948	11			1
Summary Statistics from GraphPad Prism, using survival curve analysis
Comparison of Survival Curves
Log-rank (Mantel-Cox) test (recommended)
Chi square	15.87
df	2
P value	0.0004
P value summary	***
Are the survival curves sig different?	Yes
Logrank test for trend (recommended)
Chi square	11.47
df	1
P value	0.0007
P value summary	***
Sig. trend?	Yes

## Sheet: Fig4B raw data
mouse	sex	geno	dob	date tam	weight day 1	weight day 2	weight day 3	weight day 4	weight day 5	weight day 6	weight day 7	weight day 8	weight day 9	weight day 10	weight day 11	weight day 12	weight day 13	weight day 14	weight day 15	weight day 16	weight day 17	Alive at end?
7495	m	1L/1L, 3BL/3BL	2014-12-21	5/3-5/5	26.5	26	26.6	27.4	28.1	28	28.1	28.5	28.8	29.2	28.7	28.9	28.7	28.8	28.5	28.8	28.9	y
7581	m	1L/1L, 3BL/3BL	2015-01-09	5/3-5/5	30.7	30.3	30.2	28.9	27.2	27.3	27.6	28.3	28.8	28.7	28.4	29.5	29.7	30.2	30.4	30	30.6	y
7499	f	1L/1L, 3BL/3BL	2015-12-21	5/26-5/28	22.9	21.3	21.4	21.4	22.2	22.8	23	23.2	23.8	23.3	23.1	23.3	23.4	23.8	24	24	25.3	y
7583	f	1L/1L, 3BL/3BL	2015-01-09	5/26-5/28	22.3	21.2	21.3	22	22.2	22.7	22.8	23.1	23.7	23.1	23.3	23.1	23.1	22.8	23.3	23.2	24	y
7587	f	1L/1L, 3BL/3BL	2015-01-09	5/26-5/28	22.5	21.5	22	22.5	23	23.1	23.6	23.9	24.4	23.3	23.8	23.5	23.6	23.5	24.2	23.7	24.9	y
8448	m	1L/1L, 3BL/3BL	2015-05-27	8/24-8/26	22.4	21	21.7	21.8	22	22.1	22.7	22.3	22.4	22.3	22.6	21.7	21.9	21.6	21.3	21.3	21.2	y
8454	m	1L/1L, 3BL/3BL	2015-05-27	8/24-8/26	30	27.9	28.2	29.4	30.2	30.5	29.8	30.3	30.2	30.5	31.1	30.3	31.1	30.6	30.8	31.2	30.8	y
8645	m	1L/1L, 3BL/3BL	2015-06-18	8/24-8/26	23	22	22.7	23.6	24	24	24.1	24.8	24.5	24.8	25	25	24.9	24.3	24.7	24.7	24.3	y
8647	m	1L/1L, 3BL/3BL, cre	2015-06-18	8/24-8/26	22.9	21.3	21.9	22.7	22.8	22.4	21.6	20.6	19.2	18.3	18.1	17.5	17.5	17.4	18.2	19.5	20	y
8650	f	1L/1L, 3BL/3BL, cre	2015-06-18	8/24-8/26	17.2	16.1	15.6	16.2	16.6	16.5	15.6	14.5	13.6	13.1	dead							n
8651	f	1L/1L, 3BL/3BL, cre	2015-06-18	8/24-8/26	20.3	18.5	18.6	19.6	20.3	20	19.4	17.4	16.4	16.2	15.9	16.2	15.1	14.8	15.1	15.3	16.2	y
7497	m	1L/1L, 3BL/3BL, cre	2014-12-21	5/3-5/5	31	30.7	31.1	31.5	31.2	31.4	31.2	29.9	27.6	26	24.7	24.2	23.6	23.1	23.5	24.7	26.9	y
7501	f	1L/1L, 3BL/3BL, cre	2015-12-21	5/26-5/28	19.9	19.8	19.7	20.1	19.4	19.3	18.8	17.3	16.3	15.4	dead							n
8449	m	1L/1L, 3BL/3BL, cre	2015-05-27	8/24-8/26	29	27.2	27.6	28.5	29	28.6	27.4	25.2	23.8	22.8	21.4	19.9	19.2	18.9	19.3	20	20.2	y
8450	m	1L/1L, 3BL/3BL, cre	2015-05-27	8/24-8/26	24.5	22.9	23	24	23.9	23.4	21.9	20.1	19.6	dead								n
8453	m	1L/1L, 3BL/3BL, cre	2015-05-27	8/24-8/26	27.6	25.9	26.3	26.8	27.3	26.9	26	24.6	23.1	21.5	20.8	dead						n
7493	m	1L/1L, cre	2014-12-19	5/3-5/5	33.9	33.6	34.4	34.8	35	35.8	35.9	35	35	34.8	34.8	35.5	36.1	35.4	36	36.5	35.9	y
7558	m	1L/1L, cre	2014-12-28	5/3-5/5	31.1	30.6	30.6	30.1	30.5	30.4	31.4	28.4	26.4	25.1	24.9	25.4	25.7	25.6	25.2	27.1	28	y
7796	f	1L/1L, cre	2015-02-25	5/26-5/28	22.5	20.8	21.6	21.8	22.7	22.7	22.4	21.7	20.1	18.8	16.6	16	15.5	15.4	15.6	16.5	18.6	y
7797	f	1L/1L, cre	2015-02-25	5/26-5/28	22.1	21.8	22.6	22.7	23	23.4	23.5	23.8	23.3	22.6	22	22	23	23.3	22.7	23	24.3	y
8015	f	1L/1L, cre	2015-03-18	5/26-5/28	21.8	21.3	21	21.4	22.1	22.1	22.7	22.2	21	19.8	18.7	17.6	18	18	18.1	19	20.7	y
8016	f	1L/1L, cre	2015-03-18	5/26-5/28	20.7	19.5	19.6	20.5	20.5	20.8	20.3	19.3	18	16.9	15.8	15	14.5	14.4	14.6	15.7	17.1	y
8017	f	1L/1L, cre	2015-03-18	5/26-5/28	19.6	18.2	18.4	19.4	19.9	20.2	19.9	19.9	18.3	17.3	15.6	15.5	15.9	15.8	16.6	17.8	18.9	y
8456	m	1L/1L, cre	2015-05-27	8/24-8/26	27.4	25.5	26.9	27.8	27.8	27.6	27.9	27.4	26.6	24.3	22.8	21.3	20.4	21.2	20.6	21.9	22.6	y
8674	m	1L/1L, cre	2015-06-23	8/24-8/26	21	20.5	21.2	22.1	22.1	22.2	22.4	21.5	19.6	18.4	16.9	17.3	16.8	17	17.5	18.4	20	y

## Sheet: Fig 4B avg %  initial weight
	Percent Initial Weight (Average) Day 1	Percent Initial Weight (Average) Day 2	Percent Initial Weight (Average) Day 3	Percent Initial Weight (Average) Day 4	Percent Initial Weight (Average) Day 5	Percent Initial Weight (Average) Day 6	Percent Initial Weight (Average) Day 7	Percent Initial Weight (Average) Day 8	Percent Initial Weight (Average) Day 9	Percent Initial Weight (Average) Day 10	Percent Initial Weight (Average) Day 11	Percent Initial Weight (Average) Day 12	Percent Initial Weight (Average) Day 13	Percent Initial Weight (Average) Day 14	Percent Initial Weight (Average) Day 15	Percent Initial Weight (Average) Day 16	Percent Initial Weight (Average) Day 17	18
Average LL LL	100	95.356	96.8828	98.446	99.5729	100.411	101.12	102.404	103.541	102.701	103.15	102.687	103.175	102.719	103.57	103.382	105.058
Dnmt1 Mutant	100	96.0051	98.0168	100.213	101.657	102.388	102.775	99.7426	94.4404	89.5799	84.6036	83.272	83.3644	83.5206	84.0045	88.1753	93.3627
Average LL LLCre	100	94.6729	95.2017	98.2274	98.834	97.7674	94.2223	87.6784	82.5509	79.0937	77.2395	75.7268	73.2848	72.1444	74.0546	77.2913	80.8921
SEM LL LL	0	0.762924	0.850213	1.26269	1.8992	1.82903	1.80578	1.83032	1.80498	1.79614	1.84088	1.69868	1.50651	1.38737	1.59283	1.64535	2.01317
SEM Dnmt1 MT	0	0.930216	1.01316	0.978505	0.760534	0.951919	1.0386	1.72497	2.31106	2.68158	3.33526	3.81443	4.48359	4.40054	4.2944	3.87744	3.34885
SEM LLLL Cre	0	1.049	1.16217	0.850083	0.524238	0.639276	1.18771	1.53802	1.09678	0.940509	1.13496	2.46739	2.40173	2.40738	2.72125	3.42186	4.11887
Data used for averages (% calculated as a percent of day 1 weights- for raw data, see tab 1)
mouse	sex	geno	dob	date tam	wt day1	% Day 2	Day 3	Day 4	Day 5	Day 6	Day 7	Day 8	Day 9	Day 10	Day 11	Day 12	Day 13	Day 14	Day 15	Day 16	Day 17
7495	m	1L/1L, 3BL/3BL	2014-12-21	5/3-5/5	26.5	98.1132	100.377	103.396	106.038	105.66	106.038	107.547	108.679	110.189	108.302	109.057	108.302	108.679	107.547	108.679	109.057
7581	m	1L/1L, 3BL/3BL	2015-01-09	5/3-5/5	30.7	98.6971	98.3713	94.1368	88.5993	88.9251	89.9023	92.1824	93.8111	93.4853	92.5081	96.0912	96.7427	98.3713	99.0228	97.7199	99.6743
7499	f	1L/1L, 3BL/3BL	2015-12-21	5/26-5/28	22.9	93.0131	93.4498	93.4498	96.9432	99.5633	100.437	101.31	103.93	101.747	100.873	101.747	102.183	103.93	104.803	104.803	110.48
7583	f	1L/1L, 3BL/3BL	2015-01-09	5/26-5/28	22.3	95.0673	95.5157	98.6547	99.5516	101.794	102.242	103.587	106.278	103.587	104.484	103.587	103.587	102.242	104.484	104.036	107.623
7587	f	1L/1L, 3BL/3BL	2015-01-09	5/26-5/28	22.5	95.5556	97.7778	100	102.222	102.667	104.889	106.222	108.444	103.556	105.778	104.444	104.889	104.444	107.556	105.333	110.667
8448	m	1L/1L, 3BL/3BL	2015-05-27	8/24-8/26	22.4	93.75	96.875	97.3214	98.2143	98.6607	101.339	99.5536	100	99.5536	100.893	96.875	97.7679	96.4286	95.0893	95.0893	94.6429
8454	m	1L/1L, 3BL/3BL	2015-05-27	8/24-8/26	30	93	94	98	100.667	101.667	99.3333	101	100.667	101.667	103.667	101	103.667	102	102.667	104	102.667
8645	m	1L/1L, 3BL/3BL	2015-06-18	8/24-8/26	23	95.6522	98.6957	102.609	104.348	104.348	104.783	107.826	106.522	107.826	108.696	108.696	108.261	105.652	107.391	107.391	105.652
Average						95.356	96.8828	98.446	99.5729	100.411	101.12	102.404	103.541	102.701	103.15	102.687	103.175	102.719	103.57	103.382	105.058
SEM						0.762924	0.850213	1.26269	1.8992	1.82903	1.80578	1.83032	1.80498	1.79614	1.84088	1.69868	1.50651	1.38737	1.59283	1.64535	2.01317
						% Day 2	Day 3	Day 4	Day 5	Day 6	Day 7	Day 8	Day 9	Day 10	Day 11	Day 12	Day 13	Day 14	Day 15	Day 16	Day 17
7497	m	1L/1L, 3BL/3BL, cre	2014-12-21	5/3-5/5	31	99.0323	100.323	101.613	100.645	101.29	100.645	96.4516	89.0323	83.871	79.6774	78.0645	76.129	74.5161	75.8065	79.6774	86.7742
7501	f	1L/1L, 3BL/3BL, cre	2015-12-21	5/26-5/28	19.9	99.4975	98.995	101.005	97.4874	96.9849	94.4724	86.9347	81.9095	77.3869
8449	m	1L/1L, 3BL/3BL, cre	2015-05-27	8/24-8/26	29	93.7931	95.1724	98.2759	100	98.6207	94.4828	86.8966	82.069	78.6207	73.7931	68.6207	66.2069	65.1724	66.5517	68.9655	69.6552
8450	m	1L/1L, 3BL/3BL, cre	2015-05-27	8/24-8/26	24.5	93.4694	93.8776	97.9592	97.551	95.5102	89.3878	82.0408	80
8453	m	1L/1L, 3BL/3BL, cre	2015-05-27	8/24-8/26	27.6	93.8406	95.2899	97.1014	98.913	97.4638	94.2029	89.1304	83.6957	77.8986	75.3623
8647	m	1L/1L, 3BL/3BL, cre	2015-06-18	8/24-8/26	22.9	93.0131	95.6332	99.1266	99.5633	97.8166	94.3231	89.9563	83.8428	79.9127	79.0393	76.4192	76.4192	75.9825	79.476	85.1528	87.3362
8650	f	1L/1L, 3BL/3BL, cre	2015-06-18	8/24-8/26	17.2	93.6047	90.6977	94.186	96.5116	95.9302	90.6977	84.3023	79.0698	76.1628
8651	f	1L/1L, 3BL/3BL, cre	2015-06-18	8/24-8/26	20.3	91.133	91.6256	96.5517	100	98.5222	95.5665	85.7143	80.7882	79.803	78.3251	79.803	74.3842	72.9064	74.3842	75.3695	79.803
Average						94.6729	95.2017	98.2274	98.834	97.7674	94.2223	87.6784	82.5509	79.0937	77.2395	75.7268	73.2848	72.1444	74.0546	77.2913	80.8921
SEM						1.049	1.16217	0.850083	0.524238	0.639276	1.18771	1.53802	1.09678	0.940509	1.13496	2.46739	2.40173	2.40738	2.72125	3.42186	4.11887
						% Day 2	Day 3	Day 4	Day 5	Day 6	Day 7	Day 8	Day 9	Day 10	Day 11	Day 12	Day 13	Day 14	Day 15	Day 16	Day 17
7493	m	1L/1L, cre	2014-12-19	5/3-5/5	33.9	99.115	101.475	102.655	103.245	105.605	105.9	103.245	103.245	102.655	102.655	104.72	106.49	104.425	106.195	107.67	105.9
7558	m	1L/1L, cre	2014-12-28	5/3-5/5	31.1	98.3923	98.3923	96.7846	98.0707	97.7492	100.965	91.3183	84.8875	80.7074	80.0643	81.672	82.6367	82.3151	81.0289	87.1383	90.0322
7796	f	1L/1L, cre	2015-02-25	5/26-5/28	22.5	92.4444	96	96.8889	100.889	100.889	99.5556	96.4444	89.3333	83.5556	73.7778	71.1111	68.8889	68.4444	69.3333	73.3333	82.6667
7797	f	1L/1L, cre	2015-02-25	5/26-5/28	22.1	98.6425	102.262	102.715	104.072	105.882	106.335	107.692	105.43	102.262	99.5475	99.5475	104.072	105.43	102.715	104.072	109.955
8015	f	1L/1L, cre	2015-03-18	5/26-5/28	21.8	97.7064	96.3303	98.1651	101.376	101.376	104.128	101.835	96.3303	90.8257	85.7798	80.7339	82.5688	82.5688	83.0275	87.156	94.9541
8016	f	1L/1L, cre	2015-03-18	5/26-5/28	20.7	94.2029	94.686	99.0338	99.0338	100.483	98.0676	93.2367	86.9565	81.6425	76.3285	72.4638	70.0483	69.5652	70.5314	75.8454	82.6087
8017	f	1L/1L, cre	2015-03-18	5/26-5/28	19.6	92.8571	93.8776	98.9796	101.531	103.061	101.531	101.531	93.3673	88.2653	79.5918	79.0816	81.1224	80.6122	84.6939	90.8163	96.4286
8456	m	1L/1L, cre	2015-05-27	8/24-8/26	27.4	93.0657	98.1752	101.46	101.46	100.73	101.825	100	97.0803	88.6861	83.2117	77.7372	74.4526	77.3723	75.1825	79.927	82.4818
8674	m	1L/1L, cre	2015-06-23	8/24-8/26	21	97.619	100.952	105.238	105.238	105.714	106.667	102.381	93.3333	87.619	80.4762	82.381	80	80.9524	83.3333	87.619	95.2381
Average						96.0051	98.0168	100.213	101.657	102.388	102.775	99.7426	94.4404	89.5799	84.6036	83.272	83.3644	83.5206	#REF!	88.1753	93.3627
SEM						0.930216	1.01316	0.978505	0.760534	0.951919	1.0386	1.72497	2.31106	2.68158	3.33526	3.81443	4.48359	4.40054	#REF!	3.87744	3.34885

## Sheet: ANOVA Fig4C Day5
Using GraphPad Prism, ANOVA for percent intital weight 5 days	Dnmt1LL Dnmt3bLL	Dnmt1LL VillinCreERT2	Dnmt1LL Dnmt3bLL VillinCreERT2
after tamoxifen treatment	106.038	103.245	100.645
	88.5994	98.0707	97.4874
	96.9432	100.889	100
	99.5516	104.072	97.551
	102.222	101.376	98.913
	98.2143	99.0338	99.5633
	100.667	101.531	96.5116
	104.348	101.46	100
		105.238
ANOVA summary
F	1.566
P value	0.2314
P value summary	ns
Are differences among means statistically significant? (P < 0.05)	No
R square	0.1246
ANOVA table	SS	DF	MS	F (DFn, DFd)	P value
Treatment (between columns)	36.87	2	18.43	F (2, 22) = 1.566	P = 0.2314
Residual (within columns)	259	22	11.77
Total	295.9	24
Tukey's multiple comparisons test	Mean Diff.	95% CI of diff.	Significant?	Summary	Adjusted P Value
LL LL Control vs. Dnmt1LL VillinCreERT2	-2.084	-6.273 to 2.104	No	ns	0.4374	A-B
LL LL Control vs. Dnmt1LL Dnmt3bLL VillinCreERT2	0.7389	-3.571 to 5.049	No	ns	0.9033	A-C
Dnmt1LL VillinCreERT2 vs. Dnmt1LL Dnmt3bLL VillinCreERT2	2.823	-1.365 to 7.012	No	ns	0.2301	B-C
Test details	Mean 1	Mean 2	Mean Diff.	SE of diff.	n1	n2	q	DF
LL LL Control vs. Dnmt1LL VillinCreERT2	99.57	101.7	-2.084	1.667	8	9	1.768	22
LL LL Control vs. Dnmt1LL Dnmt3bLL VillinCreERT2	99.57	98.83	0.7389	1.716	8	8	0.6091	22
Dnmt1LL VillinCreERT2 vs. Dnmt1LL Dnmt3bLL VillinCreERT2	101.7	98.83	2.823	1.667	9	8	2.395	22

## Sheet: ANOVA Fig4C Day 10
Using GraphPad Prism, ANOVA for percent intital weight 10 days	Dnmt1LL Dnmt3bLL	Dnmt1LL VillinCreERT2	Dnmt1LL Dnmt3bLL VillinCreERT2
after tamoxifen treatment	110.189	102.655	83.871
	93.4853	80.7074	77.3869
	101.747	83.5556	78.6207
	103.587	102.262	77.8986
	103.556	90.8257	79.9127
	99.5536	81.6425	76.1628
	101.667	88.2653	79.803
	107.826	88.6861
		87.6191
ANOVA summary
F	30.06
P value	< 0.0001
P value summary	****
Are differences among means statistically significant? (P < 0.05)	Yes
R square	0.7411
ANOVA table	SS	DF	MS	F (DFn, DFd)	P value
Treatment (between columns)	2106	2	1053	F (2, 21) = 30.06	P < 0.0001
Residual (within columns)	735.6	21	35.03
Total	2841	23
Tukey's multiple comparisons test	Mean Diff.	95% CI of diff.	Significant?	Summary	Adjusted P Value
LL LL Control vs. Dnmt1LL VillinCreERT2	13.12	5.873 to 20.37	Yes	***	0.0005	A-B	***
LL LL Control vs. Dnmt1LL Dnmt3bLL VillinCreERT2	23.61	15.89 to 31.33	Yes	****	< 0.0001	A-C	***
Dnmt1LL VillinCreERT2 vs. Dnmt1LL Dnmt3bLL VillinCreERT2	10.49	2.969 to 18.00	Yes	**	0.0056	B-C	**
Test details	Mean 1	Mean 2	Mean Diff.	SE of diff.	n1	n2	q	DF
LL LL Control vs. Dnmt1LL VillinCreERT2	102.7	89.58	13.12	2.876	8	9	6.453	21
LL LL Control vs. Dnmt1LL Dnmt3bLL VillinCreERT2	102.7	79.09	23.61	3.063	8	7	10.9	21
Dnmt1LL VillinCreERT2 vs. Dnmt1LL Dnmt3bLL VillinCreERT2	89.58	79.09	10.49	2.983	9	7	4.972	21

## Sheet: ANOVA Fig4C Day15
Using GraphPad Prism, ANOVA for percent intital weight 15 days		Dnmt1LL Dnmt3bLL	Dnmt1LL VillinCreERT2	Dnmt1LL Dnmt3bLL VillinCreERT2
after tamoxifen treatment		107.547	106.195	75.8064
		99.0228	81.0289	66.5517
		104.803	69.3333	79.476
		104.484	102.715	74.3842
		107.556	83.0275
		95.0893	70.5314
		102.667	84.6939
		107.391	75.1825
			83.3333
ANOVA summary
F	16.22
P value	< 0.0001
P value summary	****
Are differences among means statistically significant? (P < 0.05)	Yes
R square	0.6432
ANOVA table	SS	DF	MS	F (DFn, DFd)	P value
Treatment (between columns)	2810	2	1405	F (2, 18) = 16.22	P < 0.0001
Residual (within columns)	1559	18	86.6
Total	4368	20
Tukey's multiple comparisons test	Mean Diff.	95% CI of diff.	Significant?	Summary	Adjusted P Value
LL LL Control vs. Dnmt1LL VillinCreERT2	19.57	8.025 to 31.11	Yes	**	0.0011	A-B
LL LL Control vs. Dnmt1LL Dnmt3bLL VillinCreERT2	29.52	14.97 to 44.06	Yes	***	0.0002	A-C
Dnmt1LL VillinCreERT2 vs. Dnmt1LL Dnmt3bLL VillinCreERT2	9.95	-4.322 to 24.22	No	ns	0.2046	B-C
Test details	Mean 1	Mean 2	Mean Diff.	SE of diff.	n1	n2	q	DF
LL LL Control vs. Dnmt1LL VillinCreERT2	103.6	84	19.57	4.522	8	9	6.119	18
LL LL Control vs. Dnmt1LL Dnmt3bLL VillinCreERT2	103.6	74.05	29.52	5.699	8	4	7.325	18
Dnmt1LL VillinCreERT2 vs. Dnmt1LL Dnmt3bLL VillinCreERT2	84	74.05	9.95	5.592	9	4	2.516	18
