# Supplementary material for: The ‘de novo’ DNA methyltransferase Dnmt3b compensates the Dnmt1-deficient intestinal epithelium
Source: eLife. 2016 Jan 25;5:e12975. doi: 10.7554/eLife.12975 (PMC4786433; doi:10.7554/eLife.12975)
Supplement: Figure 5—source data 1. — DOI: http://dx.doi.org/10.7554/eLife.12975.016 [file elife-12975-fig5-data1.xlsx]

## Sheet: LINE1 data
Dnmt1LL Dnmt3BLL	Position	Replicate 1	Replicate 2	Replicate 3	Replicate 4	Average	STDEV	SEM
	CG1	83.4	83.2	80.1	87	83.425	2.82179	1.4109
	CG2	82.6	74.6	78.6	83	79.7	3.93785	1.96893
	CG3	89.2	89.3	86	91.8	89.075	2.3768	1.1884
	CG4	88.2	87.4	85.2	92.2	88.25	2.9229	1.46145
	CG5	87.3	86.6	84.5	90.3	87.175	2.39913	1.19957
	CG6	85.4	82.3	83.7	87.5	84.725	2.24258	1.12129
	CG7	84.5	81.2	84	86	83.925	2.00562	1.00281
	CG8	86.9	81.6	87.1	89	86.15	3.17753	1.58876
	CG9	86.1	85.9	87.8	87.1	86.725	0.888351	0.444175
	Average	85.9556	83.5667	84.1111	88.2111	85.4611	2.87413	0.958044
Dnmt1LL Dnmt3BLL VillinCreERT2	Position	Replicate 1	Replicate 2	Replicate 3	Replicate 4	Replicate 5	Average	STDEV	SEM
	CG1	32.3	31.5	34.1	30.4	29.3	31.52	1.83358	0.82
	CG2	34.5	32.2	41.4	33.6	31	34.54	4.06054	1.81593
	CG3	43.1	43.5	49.7	44.1	42.1	44.5	2.99666	1.34015
	CG4	43.1	41	47.6	39.4	40.8	42.38	3.20344	1.43262
	CG5	32.5	32.9	37.1	32.5	33.4	33.68	1.94731	0.870862
	CG6	35.8	35.8	39.5	34.3	32.1	35.5	2.70093	1.20789
	CG7	41.7	40	48.7	42.7	39.7	42.56	3.64664	1.63083
	CG8	41.1	35.7	44.7	33	38.1	38.52	4.56749	2.04265
	CG9	44.6	38.1	44.3	39.4	47.3	42.74	3.85266	1.72296
	Average	38.7444	36.7444	43.0111	36.6	37.0889	38.4378	4.77121	1.5904
Dnmt1LL VillinCreERT2
LINE1
	Position	Replicate 1	Replicate 2	Replicate 3	Replicate 4	AVERAGE	STDEV	SEM
	CG1	37.4	51.4	32.2	36.2	39.3	8.3674	4.1837
	CG2	39.7	52.3	35.3	37.6	41.225	7.59885	3.79942
	CG3	48.8	60.5	45.3	48.1	50.675	6.72229	3.36114
	CG4	46	57.4	41.5	45.6	47.625	6.8266	3.4133
	CG5	40.2	54.7	36.7	38.6	42.55	8.22537	4.11268
	CG6	42.9	55.1	38.2	40.3	44.125	7.565	3.7825
	CG7	44	56.1	40.8	42.5	45.85	6.95725	3.47863
	CG8	35.5	50.4	29.6	34.1	37.4	9.02478	4.51239
	CG9	36.7	51.8	31.5	36.1	39.025	8.82775	4.41387
	Average	41.2444	54.4111	36.7889	39.9	43.0861	4.38494	1.46165

## Sheet: LINE1 ANOVA
Within each row, compare columns (simple effects within rows)
Number of families	10
Number of comparisons per family	3
Alpha	0.05
Tukey's multiple comparisons test	Mean Diff.	95% CI of diff.	Significant?	Summary	Adjusted P Value
CpG1
LL LL vs. LL LL Cre	51.91	43.98 to 59.83	Yes	****	< 0.0001
LL LL vs. LL Cre	44.13	35.77 to 52.48	Yes	****	< 0.0001
LL LL Cre vs. LL Cre	-7.78	-15.71 to 0.1472	No	ns	0.0556
CpG2
LL LL vs. LL LL Cre	45.16	37.23 to 53.09	Yes	****	< 0.0001
LL LL vs. LL Cre	38.48	30.12 to 46.83	Yes	****	< 0.0001
LL LL Cre vs. LL Cre	-6.685	-14.61 to 1.242	No	ns	0.1159
CpG3
LL LL vs. LL LL Cre	44.58	36.65 to 52.50	Yes	****	< 0.0001
LL LL vs. LL Cre	38.4	30.04 to 46.76	Yes	****	< 0.0001
LL LL Cre vs. LL Cre	-6.175	-14.10 to 1.752	No	ns	0.1579
CpG4
LL LL vs. LL LL Cre	45.87	37.94 to 53.80	Yes	****	< 0.0001
LL LL vs. LL Cre	40.63	32.27 to 48.98	Yes	****	< 0.0001
LL LL Cre vs. LL Cre	-5.245	-13.17 to 2.682	No	ns	0.2616
CpG5
LL LL vs. LL LL Cre	53.5	45.57 to 61.42	Yes	****	< 0.0001
LL LL vs. LL Cre	44.63	36.27 to 52.98	Yes	****	< 0.0001
LL LL Cre vs. LL Cre	-8.87	-16.80 to -0.9428	Yes	*	0.0244
CpG6
LL LL vs. LL LL Cre	49.23	41.30 to 57.15	Yes	****	< 0.0001
LL LL vs. LL Cre	40.6	32.24 to 48.96	Yes	****	< 0.0001
LL LL Cre vs. LL Cre	-8.625	-16.55 to -0.6978	Yes	*	0.0296
CpG7
LL LL vs. LL LL Cre	41.37	33.44 to 49.29	Yes	****	< 0.0001
LL LL vs. LL Cre	38.08	29.72 to 46.43	Yes	****	< 0.0001
LL LL Cre vs. LL Cre	-3.29	-11.22 to 4.637	No	ns	0.5865
CpG8
LL LL vs. LL LL Cre	47.63	39.70 to 55.56	Yes	****	< 0.0001
LL LL vs. LL Cre	48.75	40.39 to 57.11	Yes	****	< 0.0001
LL LL Cre vs. LL Cre	1.12	-6.807 to 9.047	No	ns	0.9397
CpG9
LL LL vs. LL LL Cre	43.99	36.06 to 51.91	Yes	****	< 0.0001
LL LL vs. LL Cre	47.7	39.34 to 56.06	Yes	****	< 0.0001
LL LL Cre vs. LL Cre	3.715	-4.212 to 11.64	No	ns	0.5072
Average
LL LL vs. LL LL Cre	47.02	39.10 to 54.95	Yes	****	< 0.0001
LL LL vs. LL Cre	42.38	34.02 to 50.73	Yes	****	< 0.0001
LL LL Cre vs. LL Cre	-4.648	-12.58 to 3.279	No	ns	0.3473
Test details	Mean 1	Mean 2	Mean Diff.	SE of diff.	N1	N2	q	DF
CpG1
LL LL vs. LL LL Cre	83.43	31.52	51.91	3.332	4	5	22.03	100
LL LL vs. LL Cre	83.43	39.3	44.13	3.512	4	4	17.77	100
LL LL Cre vs. LL Cre	31.52	39.3	-7.78	3.332	5	4	3.302	100
CpG2
LL LL vs. LL LL Cre	79.7	34.54	45.16	3.332	4	5	19.17	100
LL LL vs. LL Cre	79.7	41.23	38.48	3.512	4	4	15.49	100
LL LL Cre vs. LL Cre	34.54	41.23	-6.685	3.332	5	4	2.837	100
CpG3
LL LL vs. LL LL Cre	89.08	44.5	44.58	3.332	4	5	18.92	100
LL LL vs. LL Cre	89.08	50.68	38.4	3.512	4	4	15.46	100
LL LL Cre vs. LL Cre	44.5	50.68	-6.175	3.332	5	4	2.621	100
CpG4
LL LL vs. LL LL Cre	88.25	42.38	45.87	3.332	4	5	19.47	100
LL LL vs. LL Cre	88.25	47.63	40.63	3.512	4	4	16.36	100
LL LL Cre vs. LL Cre	42.38	47.63	-5.245	3.332	5	4	2.226	100
CpG5
LL LL vs. LL LL Cre	87.18	33.68	53.5	3.332	4	5	22.71	100
LL LL vs. LL Cre	87.18	42.55	44.63	3.512	4	4	17.97	100
LL LL Cre vs. LL Cre	33.68	42.55	-8.87	3.332	5	4	3.765	100
CpG6
LL LL vs. LL LL Cre	84.73	35.5	49.23	3.332	4	5	20.89	100
LL LL vs. LL Cre	84.73	44.13	40.6	3.512	4	4	16.35	100
LL LL Cre vs. LL Cre	35.5	44.13	-8.625	3.332	5	4	3.661	100
CpG7
LL LL vs. LL LL Cre	83.93	42.56	41.37	3.332	4	5	17.56	100
LL LL vs. LL Cre	83.93	45.85	38.08	3.512	4	4	15.33	100
LL LL Cre vs. LL Cre	42.56	45.85	-3.29	3.332	5	4	1.396	100
CpG8
LL LL vs. LL LL Cre	86.15	38.52	47.63	3.332	4	5	20.22	100
LL LL vs. LL Cre	86.15	37.4	48.75	3.512	4	4	19.63	100
LL LL Cre vs. LL Cre	38.52	37.4	1.12	3.332	5	4	0.4754	100
CpG9
LL LL vs. LL LL Cre	86.73	42.74	43.99	3.332	4	5	18.67	100
LL LL vs. LL Cre	86.73	39.03	47.7	3.512	4	4	19.21	100
LL LL Cre vs. LL Cre	42.74	39.03	3.715	3.332	5	4	1.577	100
Average
LL LL vs. LL LL Cre	85.46	38.44	47.02	3.332	4	5	19.96	100
LL LL vs. LL Cre	85.46	43.09	42.38	3.512	4	4	17.06	100
LL LL Cre vs. LL Cre	38.44	43.09	-4.648	3.332	5	4	1.973	100
