# Supplementary material for: The ‘de novo’ DNA methyltransferase Dnmt3b compensates the Dnmt1-deficient intestinal epithelium
Source: eLife. 2016 Jan 25;5:e12975. doi: 10.7554/eLife.12975 (PMC4786433; doi:10.7554/eLife.12975)
Supplement: Figure 5—source data 2. — DOI: http://dx.doi.org/10.7554/eLife.12975.017 [file elife-12975-fig5-data2.xlsx]

## Sheet: D1_3B_1Wk_2
Dnmt1LL Dnmt3BLL	Position	Replicate 1	Replicate 2	Replicate 3	Replicate 4	Average	STDEV	SEM	Ttest Double MT
	CG1	44.4	43.6	41.5	47	44.125	2.27358	1.13679	0.222431
	CG2	44.9	42.9	43.9	47.3	44.75	1.88591	0.942956	0.417057
	CG3	43.1	41.1	44	47.2	43.85	2.541	1.2705	0.907142
	CG4	44.3	41.8	44.6	47.1	44.45	2.16718	1.08359	0.753218
	CG5	43.2	40.4	41.8	46	42.85	2.39096	1.19548	0.79601
	CG6	43.5	41.4	43.5	46.5	43.725	2.09821	1.04911	0.595958
	AVG					43.9583	0.661942	0.270237	0.0229017	*
Dnmt1LL Dnmt3bLL VillinCreERT2	Position	Replicate 1	Replicate 2	Replicate 3	Replicate 4	Replicate 5	Replicate 6	Average	STDEV	SEM
	CG1	35.6	41.9	45.6	41.5	43.1	41.9	41.6	3.2997	1.3471
	CG2	38.9	42	49.4	42	42	44.2	43.0833	3.52614	1.43954
	CG3	42	40.5	50.8	40.9	40.8	46.4	43.5667	4.17069	1.70268
	CG4	41.7	41.2	50.8	41.4	41.6	45.8	43.75	3.86665	1.57855
	CG5	39.6	40.1	49.1	40	40.8	44.1	42.2833	3.71883	1.5182
	CG6	39.6	40.4	49.5	40.2	41	44.6	42.55	3.8407	1.56796
	AVG							42.8056	0.81729	0.333657
genotype	Position Chr 7	%Me	%Me
Dnmt1LL Dnmt3bLL VillinCreERT2	149766621	0.356	35.6
Dnmt1LL Dnmt3bLL VillinCreERT2	149766652	0.389	38.9
Dnmt1LL Dnmt3bLL VillinCreERT2	149766676	0.42	42
Dnmt1LL Dnmt3bLL VillinCreERT2	149766678	0.417	41.7
Dnmt1LL Dnmt3bLL VillinCreERT2	149766680	0.396	39.6
Dnmt1LL Dnmt3bLL VillinCreERT2	149766690	0.396	39.6
Dnmt1LL Dnmt3bLL VillinCreERT2	149766621	0.419	41.9
Dnmt1LL Dnmt3bLL VillinCreERT2	149766652	0.42	42
Dnmt1LL Dnmt3bLL VillinCreERT2	149766676	0.405	40.5
Dnmt1LL Dnmt3bLL VillinCreERT2	149766678	0.412	41.2
Dnmt1LL Dnmt3bLL VillinCreERT2	149766680	0.401	40.1
Dnmt1LL Dnmt3bLL VillinCreERT2	149766690	0.404	40.4
Dnmt1LL Dnmt3bLL VillinCreERT2	149766621	0.456	45.6
Dnmt1LL Dnmt3bLL VillinCreERT2	149766652	0.494	49.4
Dnmt1LL Dnmt3bLL VillinCreERT2	149766676	0.508	50.8
Dnmt1LL Dnmt3bLL VillinCreERT2	149766678	0.508	50.8
Dnmt1LL Dnmt3bLL VillinCreERT2	149766680	0.491	49.1
Dnmt1LL Dnmt3bLL VillinCreERT2	149766690	0.495	49.5
Dnmt1LL Dnmt3BLL	149766621	0.444	44.4
Dnmt1LL Dnmt3BLL	149766652	0.449	44.9
Dnmt1LL Dnmt3BLL	149766676	0.431	43.1
Dnmt1LL Dnmt3BLL	149766678	0.443	44.3
Dnmt1LL Dnmt3BLL	149766680	0.432	43.2
Dnmt1LL Dnmt3BLL	149766690	0.435	43.5
Dnmt1LL Dnmt3BLL	149766621	0.436	43.6
Dnmt1LL Dnmt3BLL	149766652	0.429	42.9
Dnmt1LL Dnmt3BLL	149766676	0.411	41.1
Dnmt1LL Dnmt3BLL	149766678	0.418	41.8
Dnmt1LL Dnmt3BLL	149766680	0.404	40.4
Dnmt1LL Dnmt3BLL	149766690	0.414	41.4
Dnmt1LL Dnmt3bLL VillinCreERT2	149766621	0.415	41.5
Dnmt1LL Dnmt3bLL VillinCreERT2	149766652	0.42	42
Dnmt1LL Dnmt3bLL VillinCreERT2	149766676	0.409	40.9
Dnmt1LL Dnmt3bLL VillinCreERT2	149766678	0.414	41.4
Dnmt1LL Dnmt3bLL VillinCreERT2	149766680	0.4	40
Dnmt1LL Dnmt3bLL VillinCreERT2	149766690	0.402	40.2
Dnmt1LL Dnmt3BLL	149766621	0.415	41.5
Dnmt1LL Dnmt3BLL	149766652	0.439	43.9
Dnmt1LL Dnmt3BLL	149766676	0.44	44
Dnmt1LL Dnmt3BLL	149766678	0.446	44.6
Dnmt1LL Dnmt3BLL	149766680	0.418	41.8
Dnmt1LL Dnmt3BLL	149766690	0.435	43.5
Dnmt1LL Dnmt3BLL	149766621	0.47	47
Dnmt1LL Dnmt3BLL	149766652	0.473	47.3
Dnmt1LL Dnmt3BLL	149766676	0.472	47.2
Dnmt1LL Dnmt3BLL	149766678	0.471	47.1
Dnmt1LL Dnmt3BLL	149766680	0.46	46
Dnmt1LL Dnmt3BLL	149766690	0.465	46.5
Dnmt1LL Dnmt3bLL VillinCreERT2	149766621	0.419	41.9
Dnmt1LL Dnmt3bLL VillinCreERT2	149766652	0.442	44.2
Dnmt1LL Dnmt3bLL VillinCreERT2	149766676	0.464	46.4
Dnmt1LL Dnmt3bLL VillinCreERT2	149766678	0.458	45.8
Dnmt1LL Dnmt3bLL VillinCreERT2	149766680	0.441	44.1
Dnmt1LL Dnmt3bLL VillinCreERT2	149766690	0.446	44.6
