# Supplementary material for: The ‘de novo’ DNA methyltransferase Dnmt3b compensates the Dnmt1-deficient intestinal epithelium
Source: eLife. 2016 Jan 25;5:e12975. doi: 10.7554/eLife.12975 (PMC4786433; doi:10.7554/eLife.12975)
Supplement: Figure 5—source data 3. — DOI: http://dx.doi.org/10.7554/eLife.12975.018 [file elife-12975-fig5-data3.xlsx]

## Sheet: LINE1 data and analysis
genotype	Position in LINE1	meC		Dnmt1LL Dnmt3B LL	Position	Replicate 1	Replicate 2	Replicate 3	Replicate 4	Average	STDEV	SEM
Dnmt1LL Dnmt3B LL	976	0.834			CG1	83.4	83.2	80.1	87	83.425	2.82179	1.4109
Dnmt1LL Dnmt3B LL	986	0.826			CG2	82.6	74.6	78.6	83	79.7	3.93785	1.96893
Dnmt1LL Dnmt3B LL	997	0.892			CG3	89.2	89.3	86	91.8	89.075	2.3768	1.1884
Dnmt1LL Dnmt3B LL	1002	0.882			CG4	88.2	87.4	85.2	92.2	88.25	2.9229	1.46145
Dnmt1LL Dnmt3B LL	1021	0.873			CG5	87.3	86.6	84.5	90.3	87.175	2.39913	1.19957
Dnmt1LL Dnmt3B LL	1033	0.854			CG6	85.4	82.3	83.7	87.5	84.725	2.24258	1.12129
Dnmt1LL Dnmt3B LL	1054	0.845			CG7	84.5	81.2	84	86	83.925	2.00562	1.00281
Dnmt1LL Dnmt3B LL	1058	0.869			CG8	86.9	81.6	87.1	89	86.15	3.17753	1.58876
Dnmt1LL Dnmt3B LL	1072	0.861			CG9	86.1	85.9	87.8	87.1	86.725	0.888351	0.444175
Dnmt3BLL VillinCreERT2	976	0.767			Average					85.4611	2.87413	0.958044
Dnmt3BLL VillinCreERT2	986	0.772
Dnmt3BLL VillinCreERT2	997	0.852
Dnmt3BLL VillinCreERT2	1002	0.804
Dnmt3BLL VillinCreERT2	1021	0.777		Dnmt3BLL VillinCreERT2	Position	Replicate 1	Replicate 2	Average	STDEV	SEM
Dnmt3BLL VillinCreERT2	1033	0.772			CG1	76.7	78.2	77.45	1.06066	0.75
Dnmt3BLL VillinCreERT2	1054	0.819			CG2	77.2	79	78.1	1.27279	0.9
Dnmt3BLL VillinCreERT2	1058	0.832			CG3	85.2	90.4	87.8	3.67696	2.6
Dnmt3BLL VillinCreERT2	1072	0.818			CG4	80.4	91.5	85.95	7.84889	5.55
Dnmt1LL Dnmt3B LL	976	0.832			CG5	77.7	88.2	82.95	7.42462	5.25
Dnmt1LL Dnmt3B LL	986	0.746			CG6	77.2	84	80.6	4.80833	3.4
Dnmt1LL Dnmt3B LL	997	0.893			CG7	81.9	87.1	84.5	3.67696	2.6
Dnmt1LL Dnmt3B LL	1002	0.874			CG8	83.2	80.1	81.65	2.19203	1.55
Dnmt1LL Dnmt3B LL	1021	0.866			CG9	81.8	81.5	81.65	0.212132	0.15
Dnmt1LL Dnmt3B LL	1033	0.823			Average			82.2944	3.42294	1.14098
Dnmt1LL Dnmt3B LL	1054	0.812
Dnmt1LL Dnmt3B LL	1058	0.816
Dnmt1LL Dnmt3B LL	1072	0.859
Dnmt1LL Dnmt3B LL	976	0.801
Dnmt1LL Dnmt3B LL	986	0.786
Dnmt1LL Dnmt3B LL	997	0.86
Dnmt1LL Dnmt3B LL	1002	0.852
Dnmt1LL Dnmt3B LL	1021	0.845
Dnmt1LL Dnmt3B LL	1033	0.837
Dnmt1LL Dnmt3B LL	1054	0.84
Dnmt1LL Dnmt3B LL	1058	0.871
Dnmt1LL Dnmt3B LL	1072	0.878
Dnmt1LL Dnmt3B LL	976	0.87
Dnmt1LL Dnmt3B LL	986	0.83
Dnmt1LL Dnmt3B LL	997	0.918
Dnmt1LL Dnmt3B LL	1002	0.922
Dnmt1LL Dnmt3B LL	1021	0.903
Dnmt1LL Dnmt3B LL	1033	0.875
Dnmt1LL Dnmt3B LL	1054	0.86
Dnmt1LL Dnmt3B LL	1058	0.89
Dnmt1LL Dnmt3B LL	1072	0.871
Dnmt3BLL VillinCreERT2	976	0.782
Dnmt3BLL VillinCreERT2	986	0.79
Dnmt3BLL VillinCreERT2	997	0.904
Dnmt3BLL VillinCreERT2	1002	0.915
Dnmt3BLL VillinCreERT2	1021	0.882
Dnmt3BLL VillinCreERT2	1033	0.84
Dnmt3BLL VillinCreERT2	1054	0.871
Dnmt3BLL VillinCreERT2	1058	0.801
Dnmt3BLL VillinCreERT2	1072	0.815

## Sheet: H19 data and analysis
Dnmt1LL Dnmt3B LL	Position	Replicate 1	Replicate 2	Replicate 3	Replicate 4	Average	STDEV	SEM	Ttest single MT
	CG1	44.4	43.6	41.5	47	44.125	2.27358	1.13679	0.30593
	CG2	44.9	42.9	43.9	47.3	44.75	1.88591	0.942956	0.148291
	CG3	43.1	41.1	44	47.2	43.85	2.541	1.2705	0.563132
	CG4	44.3	41.8	44.6	47.1	44.45	2.16718	1.08359	0.469285
	CG5	43.2	40.4	41.8	46	42.85	2.39096	1.19548	0.549219
	CG6	43.5	41.4	43.5	46.5	43.725	2.09821	1.04911	0.35107
	AVG					43.9583	0.661942	0.270237	0.000639252
Dnmt3BLL VillinCreERT2	Position	Replicate 1	Replicate 2	Average	STDEV	SEM
	CG1	41	43	42	1.41421	1
	CG2	40.7	43.1	41.9	1.69706	1.2
	CG3	42.7	42.6	42.65	0.0707107	0.05
	CG4	43.3	43	43.15	0.212132	0.15
	CG5	41	42.3	41.65	0.919239	0.65
	CG6	42.4	41.7	42.05	0.494975	0.35
	AVG			42.2333	0.658281	0.268742
genotype	Position Chr 7	%Me	%Me
Dnmt1LL Dnmt3B LL	149766621	0.444	44.4
Dnmt1LL Dnmt3B LL	149766652	0.449	44.9
Dnmt1LL Dnmt3B LL	149766676	0.431	43.1
Dnmt1LL Dnmt3B LL	149766678	0.443	44.3
Dnmt1LL Dnmt3B LL	149766680	0.432	43.2
Dnmt1LL Dnmt3B LL	149766690	0.435	43.5
Dnmt3BLL VillinCreERT2	149766621	0.41	41
Dnmt3BLL VillinCreERT2	149766652	0.407	40.7
Dnmt3BLL VillinCreERT2	149766676	0.427	42.7
Dnmt3BLL VillinCreERT2	149766678	0.433	43.3
Dnmt3BLL VillinCreERT2	149766680	0.41	41
Dnmt3BLL VillinCreERT2	149766690	0.424	42.4
Dnmt1LL Dnmt3B LL	149766621	0.436	43.6
Dnmt1LL Dnmt3B LL	149766652	0.429	42.9
Dnmt1LL Dnmt3B LL	149766676	0.411	41.1
Dnmt1LL Dnmt3B LL	149766678	0.418	41.8
Dnmt1LL Dnmt3B LL	149766680	0.404	40.4
Dnmt1LL Dnmt3B LL	149766690	0.414	41.4
Dnmt1LL Dnmt3B LL	149766621	0.415	41.5
Dnmt1LL Dnmt3B LL	149766652	0.439	43.9
Dnmt1LL Dnmt3B LL	149766676	0.44	44
Dnmt1LL Dnmt3B LL	149766678	0.446	44.6
Dnmt1LL Dnmt3B LL	149766680	0.418	41.8
Dnmt1LL Dnmt3B LL	149766690	0.435	43.5
Dnmt1LL Dnmt3B LL	149766621	0.47	47
Dnmt1LL Dnmt3B LL	149766652	0.473	47.3
Dnmt1LL Dnmt3B LL	149766676	0.472	47.2
Dnmt1LL Dnmt3B LL	149766678	0.471	47.1
Dnmt1LL Dnmt3B LL	149766680	0.46	46
Dnmt1LL Dnmt3B LL	149766690	0.465	46.5
Dnmt3BLL VillinCreERT2	149766621	0.43	43
Dnmt3BLL VillinCreERT2	149766652	0.431	43.1
Dnmt3BLL VillinCreERT2	149766676	0.426	42.6
Dnmt3BLL VillinCreERT2	149766678	0.43	43
Dnmt3BLL VillinCreERT2	149766680	0.423	42.3
Dnmt3BLL VillinCreERT2	149766690	0.417	41.7
